# Supplementary material for: Olfactory Function in Patients with Inflammatory Bowel Disease (IBD) Is Associated with Their Body Mass Index and Polymorphism in the Odor Binding-Protein (OBPIIa) Gene
Source: MDPI journal article supplement (doi:10.3390/nu13020703), 2021-02-22
Supplement: s1 [file s1]

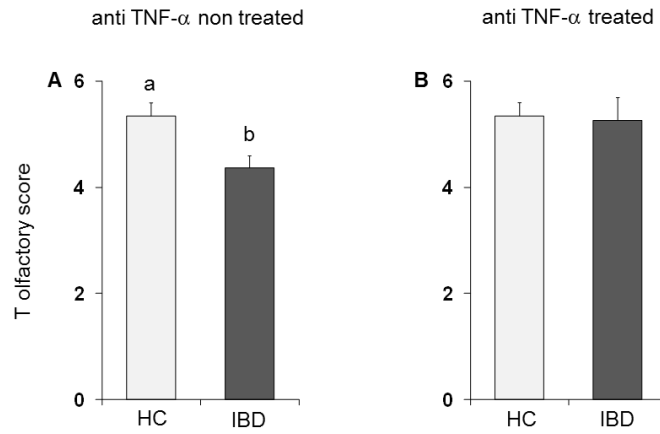

**Figure S1.** Mean ( $\pm$  SE) values of the T olfactory score determined in HC subjects ( $n = 99$ ), and IBD patients not treated with anti TNF- $\alpha$  (A;  $n = 78$ ) or IBD patients treated with anti TNF- $\alpha$  (B;  $n = 22$ ). One-way ANOVA revealed a significant effect of the health status on the T olfactory score in the IBD patients treated with anti TNF- $\alpha$  ( $F_{1,175} = 6.02$ ;  $p = 0.005$ ), while no difference was observed between HC subjects and IBD patients not treated with anti TNF- $\alpha$  ( $F_{1,119} = 0.02$ ;  $p = 0.889$ ). Different letters indicate a significant difference ( $p = 0.005$ , Fisher's LSD test).
